# Supplementary material
Source: PubMed Central journal article supplement (PMC8041247)
Supplement: NIHMS1541515-supplement-1.pdf [file NIHMS1541515-supplement-1.pdf]

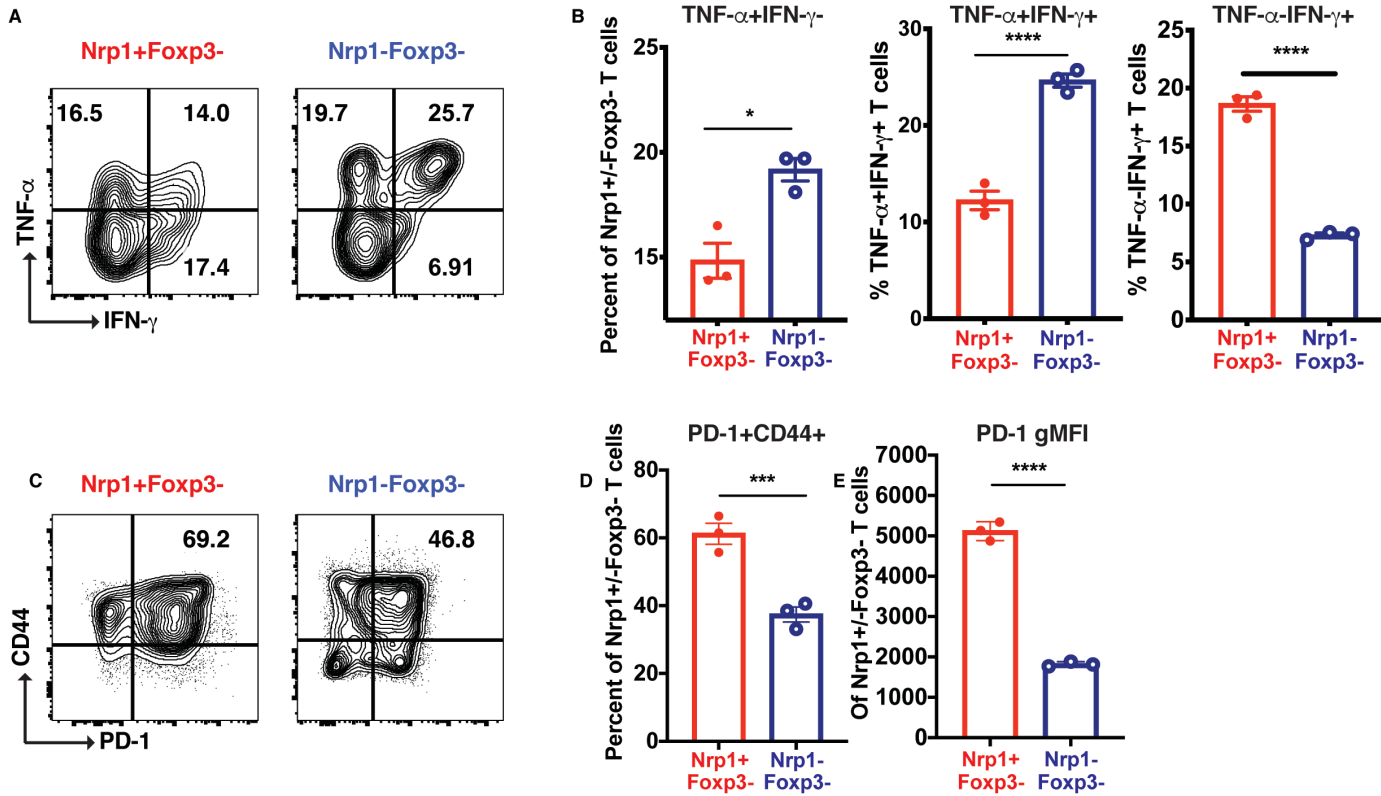

**Supplemental Figure 1: Nrp1-Foxp3- CD4 T cells secreted both IFN- $\gamma$  and TNF- $\alpha$ , whereas Foxp3-Nrp1+ CD4 T cells secreted primarily IFN- $\gamma$  and displayed markers of functional exhaustion.** Representative contour plots of IFN- $\gamma$  by TNF- $\alpha$ , gated on Nrp1+/-Foxp3- CD4 T cells (A). Pooled percentages of TNF- $\alpha$ +IFN- $\gamma$ -, TNF- $\alpha$ +IFN- $\gamma$ +, and TNF- $\alpha$ -IFN- $\gamma$ + CD4+ T cells, gated on Nrp1+Foxp3- (red) or Nrp1-Foxp3- CD4 T cells (blue) (B). Representative contour plots of PD-1 by CD44, gated on Nrp1+Foxp3- or Nrp1-Foxp3- CD4 T cells (C). Pooled percentages of PD-1+CD44+ T cells (D) and PD-1 gMFI (E), gated on Nrp1+Foxp3- or Nrp1-Foxp3- CD4 T cells. Results are expressed as the mean  $\pm$  s.e.m from one independent experiment (n=3). Statistical significant differences were at \*P < 0.05, \*\*\*P < 0.001, \*\*\*\*P < 0.0001.
